# Supplementary material for: Regulation of eDHFR-tagged proteins with trimethoprim PROTACs
Source: PubMed Central journal article supplement (PMC10624689; doi:10.1038/s41467-023-42820-3), 2023-11-03
Supplement: 41467_2023_42820_MOESM1_ESM.pdf [file 41467_2023_42820_MOESM1_ESM.pdf]

## **Regulation of eDHFR-tagged proteins with trimethoprim PROTACs**

Jean M. Etersque<sup>1†</sup>, Iris K. Lee<sup>1†</sup>, Nitika Sharma<sup>1†</sup>, Kexiang Xu<sup>1</sup>, Andrew Ruff<sup>1</sup>, Justin D. Northrup<sup>1</sup>, Swarbhanu Sarkar<sup>1</sup>, Tommy Nguyen<sup>1</sup>, Richard Lauman<sup>2</sup>, George M. Burslem<sup>2,3</sup>, and Mark A. Sellmyer<sup>1,2\*</sup>

1. Department of Radiology, Perelman School of Medicine, University of Pennsylvania, Philadelphia, PA, USA. 2. The Department of Biochemistry and Biophysics, Perelman School of Medicine, University of Pennsylvania, Philadelphia, PA, USA. 3. The Department of Cancer Biology, Perelman School of Medicine, University of Pennsylvania, Philadelphia, PA, USA.

<sup>†</sup>Authors contributed equally to this work, order was assigned alphabetically.

\* Correspondence should be addressed to:

Mark A. Sellmyer (mark.sellmyer@penmedicine.upenn.edu)  
<https://orcid.org/0000-0002-1407-1905>

Department of Radiology  
Perelman School of Medicine at the University of Pennsylvania  
813A Stellar-Chance Labs  
422 Curie Boulevard  
Philadelphia, PA 19104-6059  
Phone: 215-573-3212

A.

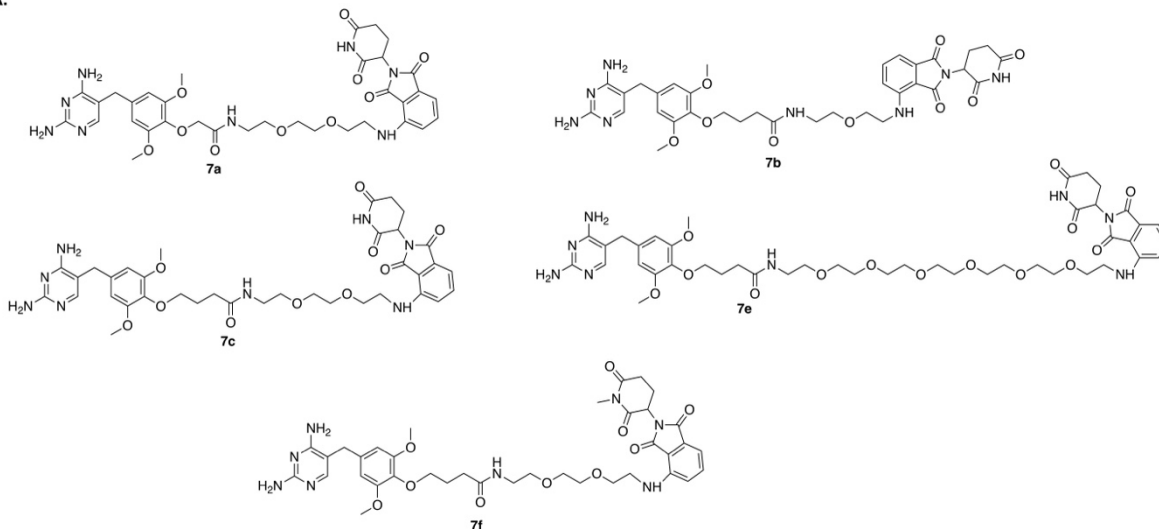

**Supplementary Figure 1. Library of TMP PROTACs.** Structures of the synthesized PROTACs **7a-c, e, and f.**

A.

| PK parameters              | Unit      | Mouse 1 | Mouse 2 | Mouse 3 | Mouse 10 | Mouse 11 | Mean  | SD    | CV(%) |
|----------------------------|-----------|---------|---------|---------|----------|----------|-------|-------|-------|
| Cl <sub>obs</sub>          | mL/min/kg | 59.8    | 233     | 56.6    | 125      | 210      | 137   | 83    | 60.3  |
| T <sub>1/2</sub>           | h         | 0.666   | 0.361   | 0.707   | 0.177    | 0.518    | 0.486 | 0.220 | 45.2  |
| C <sub>0</sub>             | ng/mL     | 2404    | 563     | 2792    | 1699     | 733      | 1638  | 987   | 60.3  |
| AUC <sub>last</sub>        | h*ng/mL   | 278     | 70.8    | 294     | 133      | 77.9     | 171   | 108   | 63.3  |
| AUC <sub>inf</sub>         | h*ng/mL   | 279     | 71.4    | 294     | 134      | 79.3     | 172   | 108   | 62.9  |
| AUC <sub>%Extrap_obs</sub> | %         | 0.245   | 0.774   | 0.239   | 0.549    | 1.82     | 0.73  | 0.65  | 89.8  |
| MRT <sub>inf_obs</sub>     | h         | 0.231   | 0.220   | 0.207   | 0.105    | 0.240    | 0.201 | 0.055 | 27.3  |
| AUC <sub>last/D</sub>      | h*mg/mL   | 278     | 70.8    | 294     | 133      | 77.9     | 171   | 108   | 63.3  |
| V <sub>ss_obs</sub>        | L/kg      | 0.827   | 3.09    | 0.704   | 0.787    | 3.03     | 1.69  | 1.25  | 74.3  |

B.

| PK parameters              | Unit    | Mouse 7 | Mouse 8 | Mouse 9 | Mean  | SD    | CV(%) |
|----------------------------|---------|---------|---------|---------|-------|-------|-------|
| T <sub>1/2</sub>           | h       | 9.56    | 0.925   | 2.29    | 4.26  | 4.64  | 109   |
| T <sub>max</sub>           | h       | 0.250   | 0.500   | 0.0830  | 0.278 | 0.210 | 75.6  |
| C <sub>max</sub>           | ng/mL   | 7730    | 8560    | 2830    | 6373  | 3097  | 48.6  |
| AUC <sub>last</sub>        | h*ng/mL | 8345    | 9100    | 4716    | 7387  | 2344  | 31.7  |
| AUC <sub>inf</sub>         | h*ng/mL | 8502    | 9108    | 4720    | 7443  | 2378  | 31.9  |
| AUC <sub>%Extrap_obs</sub> | %       | 1.85    | 0.0829  | 0.0853  | 0.67  | 1.02  | 152   |
| MRT <sub>inf_obs</sub>     | h       | 2.09    | 0.812   | 1.71    | 1.54  | 0.66  | 42.7  |
| AUC <sub>last/D</sub>      | h*mg/mL | 167     | 182     | 94.3    | 148   | 47    | 31.7  |
| F                          | %       | 99.1    | 106     | 55.0    | 87    | 28    | 31.9  |

C.

| PK parameters              | Unit    | Mouse 4 | Mouse 5 | Mouse 6 | Mean   | SD | CV(%) |
|----------------------------|---------|---------|---------|---------|--------|----|-------|
| T <sub>1/2</sub>           | h       | NA      | 2.90    | NA      | NA     | NA | NA    |
| T <sub>max</sub>           | h       | NA      | 0.0830  | 1.00    | 0.54   | NA | NA    |
| C <sub>max</sub>           | ng/mL   | NA      | 1.12    | 2.48    | 1.80   | NA | NA    |
| AUC <sub>last</sub>        | h*ng/mL | NA      | 1.55    | 1.10    | 1.33   | NA | NA    |
| AUC <sub>inf</sub>         | h*ng/mL | NA      | 3.66    | NA      | NA     | NA | NA    |
| AUC <sub>%Extrap_obs</sub> | %       | NA      | 57.5    | NA      | NA     | NA | NA    |
| MRT <sub>inf_obs</sub>     | h       | NA      | 3.98    | NA      | NA     | NA | NA    |
| AUC <sub>last/D</sub>      | h*mg/mL | NA      | 0.155   | 0.110   | 0.133  | NA | NA    |
| F                          | %       | NA      | 0.0911  | 0.0645  | 0.0778 | NA | NA    |

D.

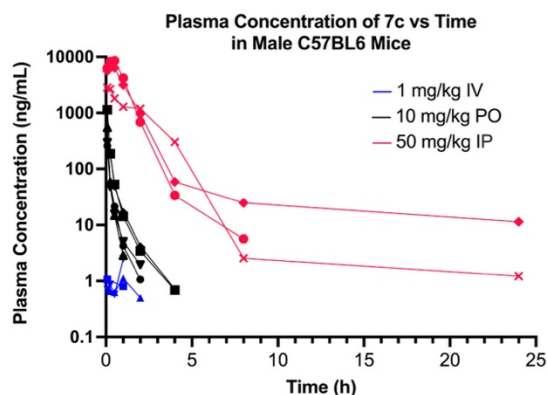

**Supplementary Figure 2. *In vivo* pharmacokinetic profile of 7c in male C57BL6 mice.**

**A.** Summary of 7c IV pharmacokinetics (1 mg/kg) in mice. **B.** Summary of 7c IP pharmacokinetics (50 mg/kg) in mice. **C.** Summary of 7c PO pharmacokinetics (10 mg/kg) in mice. **D.** Mean plasma concentration vs. time graph by the delivery route (IV, IP, and PO) in mice.

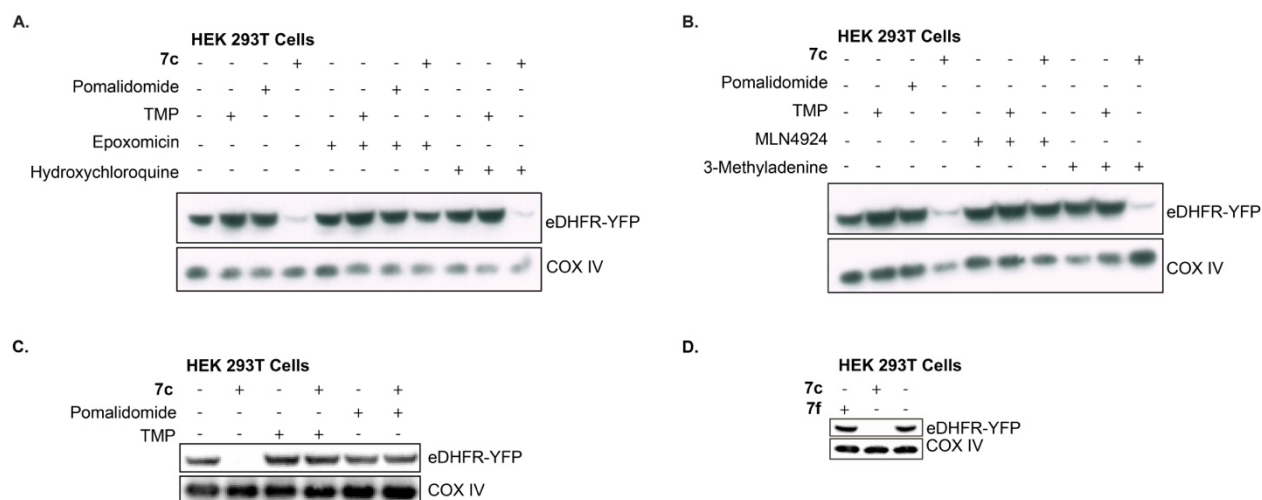

### Supplementary Figure 3. Characterization of 7c-induced degradation mechanism of eDHFR

**fusion proteins. A.** HEK293T-eDHFR-YFP cells were pre-incubated with 500 nM epoxomicin

or 25  $\mu$ M hydroxychloroquine sulfate for 1 hour, followed by additional 12 hours of incubation in

presence of 100 nM **7c**, 25  $\mu$ M TMP, or 2.5  $\mu$ M pomalidomide. eDHFR-YFP was detected with

anti-GFP antibody. eDHFR-YFP protein fusion is 45 kDa. COX IV = loading control, 18 kDa.

n=3. **B.** HEK293T-eDHFR-YFP cells were pre-incubated with 500 nM MLN4924 or 25  $\mu$ M 3-

methyladenine for 1 hour followed by additional 12 hours of incubation in presence of 100 nM

**7c**, 25  $\mu$ M TMP, or 2.5  $\mu$ M pomalidomide. eDHFR-YFP was detected with anti-GFP antibody.

eDHFR-YFP protein fusion is 45 kDa. COX IV = loading control, 18 kDa. n=3 **C.** HEK293T-

eDHFR-YFP cells were co-treated with 25  $\mu$ M TMP or 2.5  $\mu$ M pomalidomide and along with 100

nM **7c**. eDHFR-YFP was detected with anti-GFP antibody. eDHFR-YFP protein fusion is 45

kDa. COX IV = loading control, 18 kDa. n=2. **D.** HEK293T-eDHFR-YFP cells were incubated

with 100 nM **7f**, 100 nM **7c**, or 500 nM epoxomicin for 24 hours. eDHFR-YFP was detected with

anti-GFP antibody. eDHFR-YFP protein fusion is 45 kDa. COX IV = loading control, 18 kDa.

n=3.

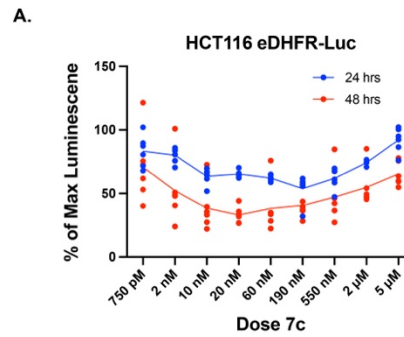

**Supplementary Figure 4. Measuring degradation using 7c in HCT116 cells that have low Cereblon expression.** HCT116 cells expressing eDHFR-Luciferase were incubated with 7c for 24 and 48 hours. Following incubation, D-Luciferin was added to the cells and the luminescence was measured using a plate reader to assess the level of Luciferase expression. n=3, data points are mean  $\pm$  SD from representative experiment, n=6 technical replicates.

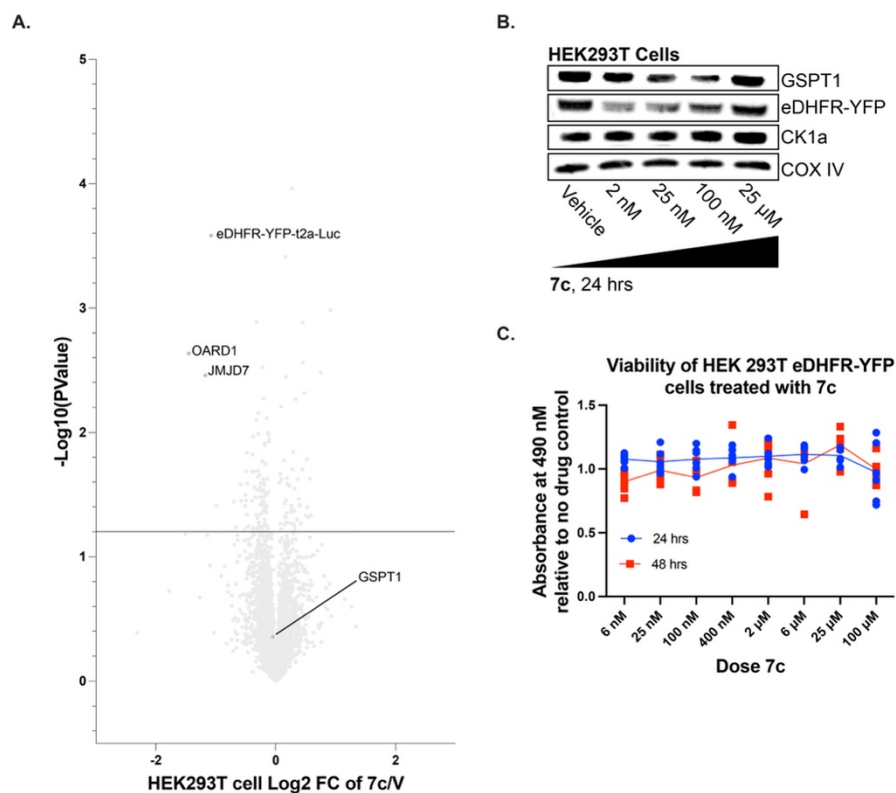

**Supplementary Figure 5. Characterization of IMiD-sensitive proteins in HEK293T-eDHFR-YFP cells and cell viability.** **A.** Mass spectrometry proteomics of cell lysates from HEK293T-eDHFR-YFP cells treated with 100 nM 7c for 48 hours. Volcano plot shows effect of 7c on protein levels in HEK-eDHFR-YFP cells relative to vehicle control.  $n=2$ , each experiment with 4 technical replicates, data point represents mean value. Statistical significance was determined using a two-tailed student's t-test. **B.** Dose-response characterization of off-target binding and degradation of GSPT1 and CK1 $\alpha$  in HEK293T-eDHFR-YFP cells after 24h incubation. GSPT1 detected with anti-eRF3 antibody, 56 kDa, eDHFR-YFP with anti-GFP antibody, 45 kDa, and CK1 $\alpha$  with anti-CK1 $\alpha$  antibody, 39 kDa. COX IV = loading control, 18 kDa.  $n=3$ . **C.** Dose response-cell viability characterization of HEK-eDHFR-YFP cells when treated with 7c for either

24 or 48 hours compared to no drug control. n=1, data points are mean  $\pm$  SD, n=6 technical replicates.

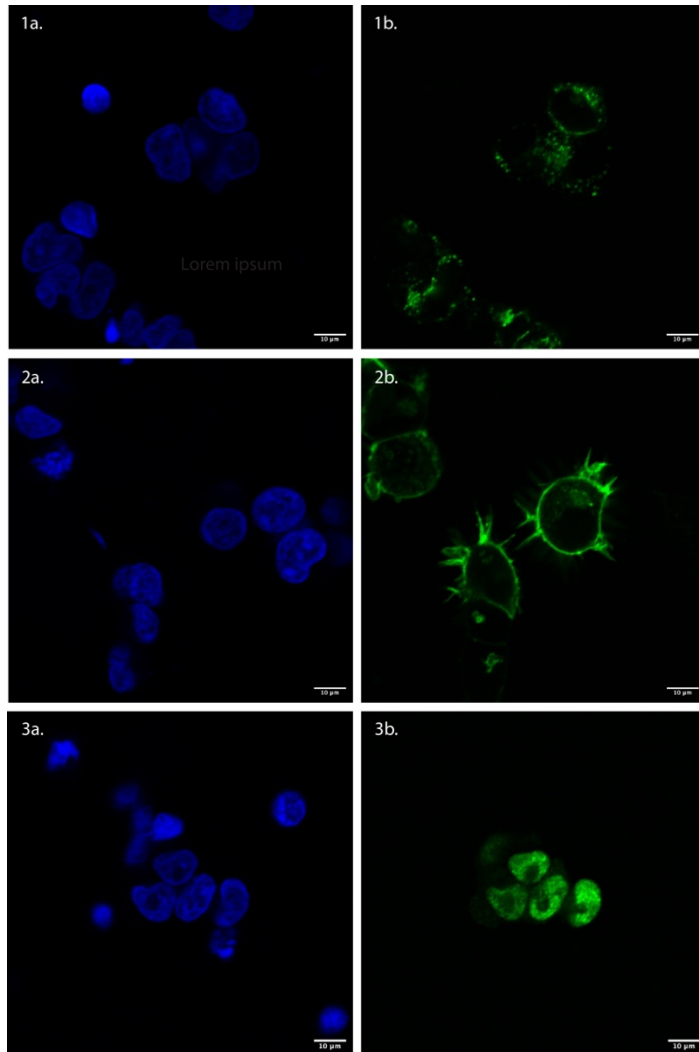

**Supplementary Figure 6. Immunofluorescence microscopy of OVCAR8-eDHFR-POI-FLAG**

**cells.** Immunofluorescence of OVCAR8 cells expressing POI-eDHFR-FLAG constructs with AlexaFluor-488 secondary antibody against Anti-FLAG primary antibody (green), and DAPI nuclear staining (blue). 1a. IL2RB-eDHFR-FLAG DAPI-stained nucleus. 1b. CD122-eDHFR-FLAG localized in endosomes with AlexaFluor-488 secondary antibody 2a. LCK-eDHFR-FLAG DAPI-stained nucleus. 2b. Membrane associated LCK-eDHFR-FLAG with AlexaFluor-488

secondary antibody. 3a. RUNX1-eDHFR-FLAG DAPI-stained nucleus. 3b. RUNX1-eDHFR-FLAG localized in the nucleus with AlexaFluor-488 secondary antibody.

A.

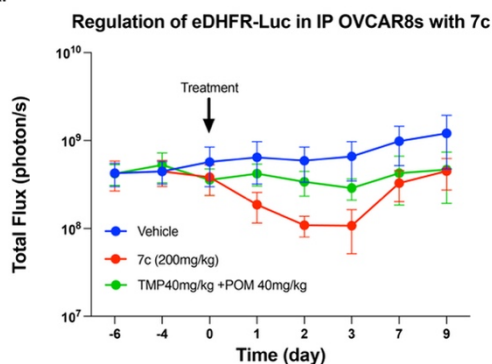

**Supplementary Figure 7. Regulation of eDHFR-luciferase expression *in vivo* with TMP + pomalidomide admixture control. A.**  $10 \times 10^6$  OVCAR8-DL cells were injected intraperitoneally (IP) in CD-1 nu/nu mice. Following 4 weeks of tumor growth, bioluminescence imaging (BLI) was performed to measure baseline luciferase expression (Day -4). On Day 0, 200 mg/kg of **7c**, 40 mg/kg TMP + 40 mg/kg pomalidomide admixture or vehicle was administered IP 3 times every 3 hours, and bioluminescence imaging (BLI) was performed 1 hour after the last dose and monitored for 9 days.  $n=5$  for each group, data points are mean  $\pm$  SEM.



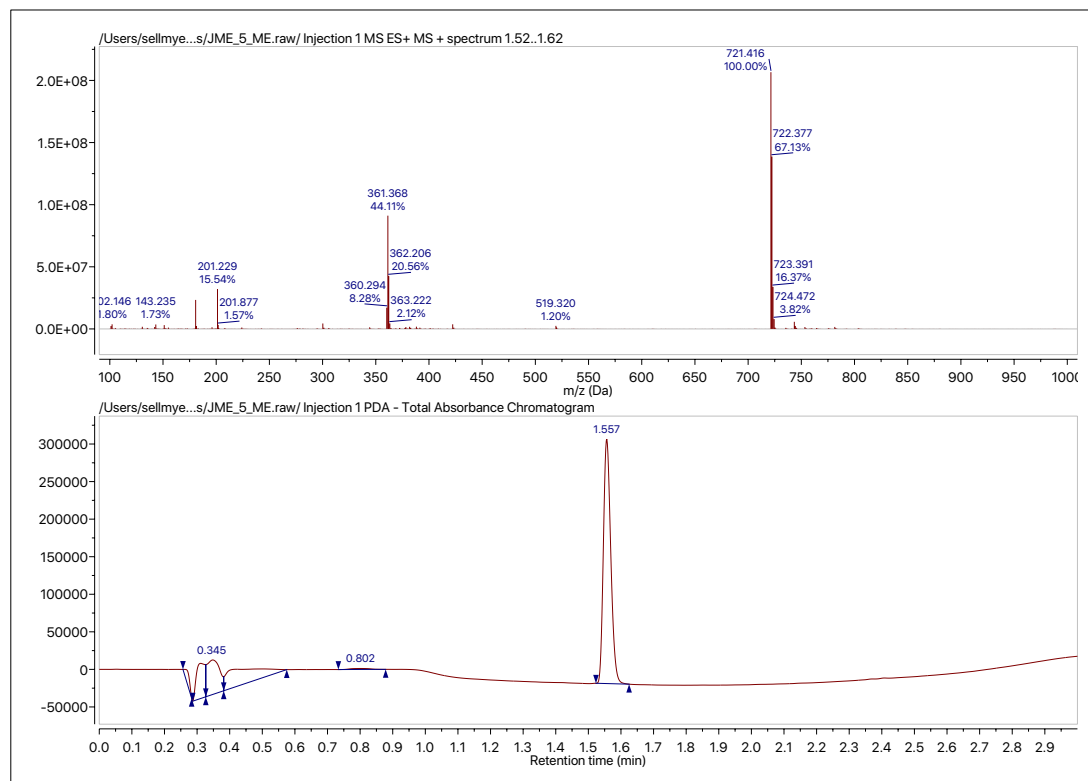**Supplementary Figure 8. LCMS spectrum of compound 7a.**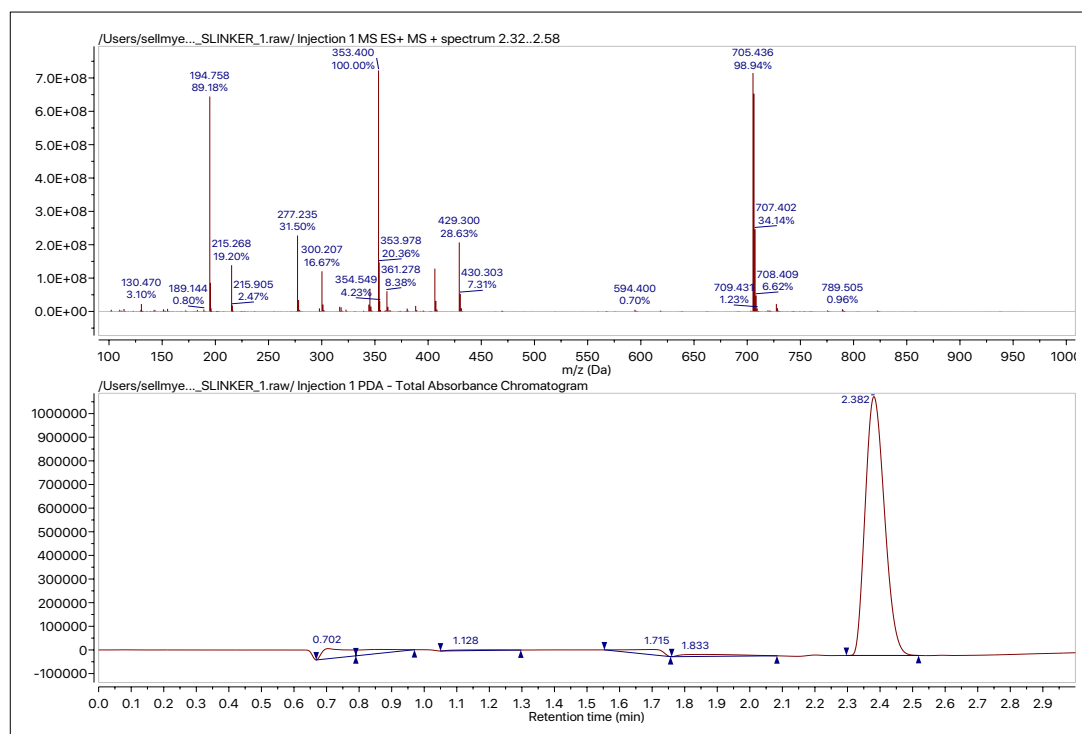

Supplementary Figure 9. LCMS spectrum of compound 7b.

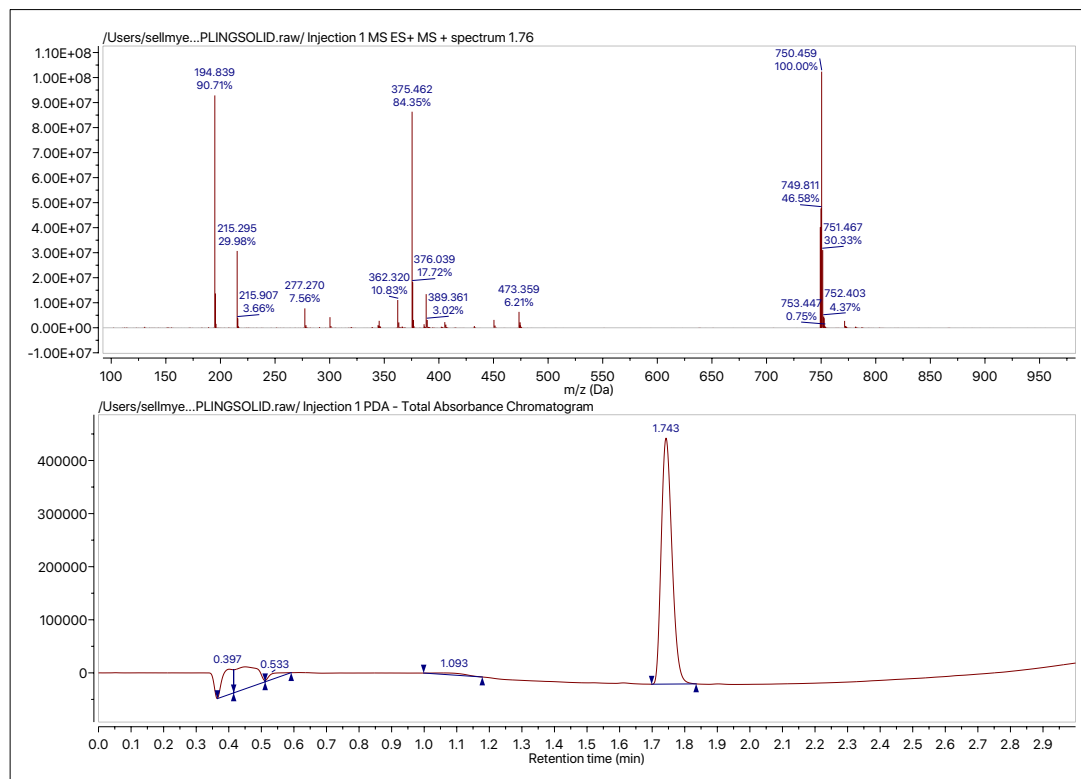

Supplementary Figure 10. LCMS spectrum 7c.

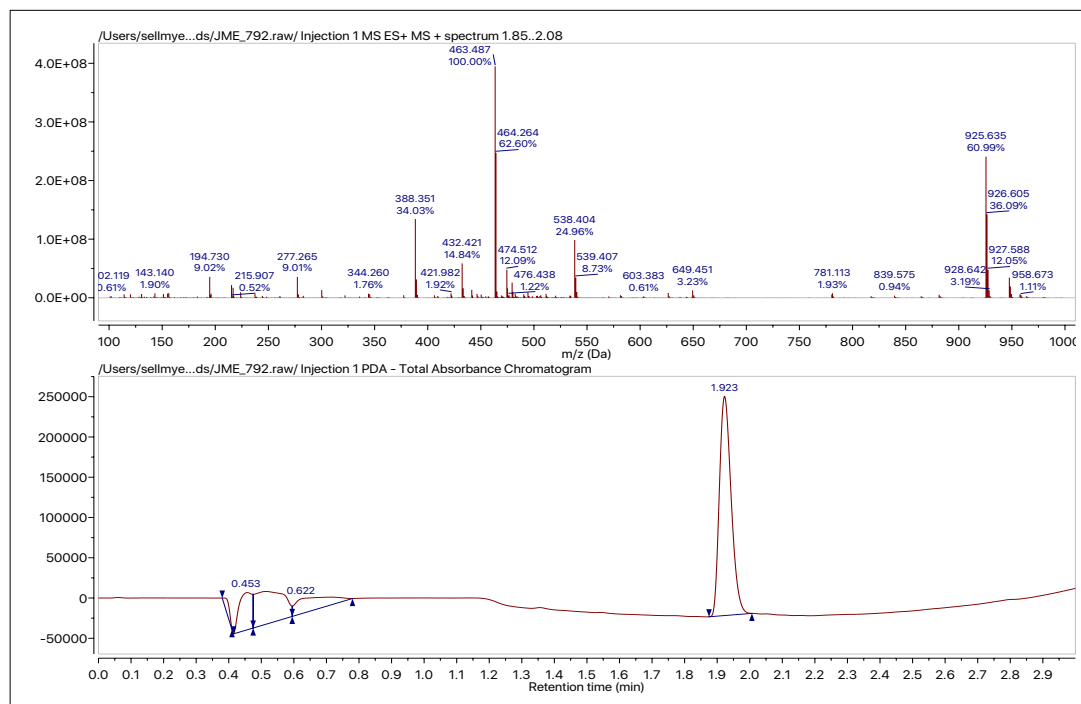

Supplementary Figure 11. LCMS spectrum of compound 7e.
